# Supplementary material
Source: HighWire-hosted journal article supplement (https://bmjopen.bmj.com/content/12/7/e056716)
Supplement: inline-supplementary-material-1 [file inline-supplementary-material-1.pdf]

**Supplementary Table 1. The most popular keyword combinations, according to Yandex, in which the words “smell” and “levofloxacin” may occur.**

| <b>Keyword</b>                              | <b>Possible combination</b>                                         |
|---------------------------------------------|---------------------------------------------------------------------|
| Smell                                       | what organ is responsible for smell?                                |
|                                             | how does the sense of smell work?                                   |
|                                             | what is smell                                                       |
|                                             | what is the name of smell and taste?                                |
|                                             | What can you smell to test your sense of smell?                     |
|                                             | what diseases cause loss of smell                                   |
|                                             | how to develop a human sense of smell                               |
|                                             | lost sense of smell without fever                                   |
|                                             | the sense of smell sometimes disappears then appears during the day |
|                                             | I lost my sense of smell and taste what to do                       |
|                                             | when is the sense of smell lost?                                    |
|                                             | reasons for the loss of smell and taste in people                   |
|                                             | how to restore your sense of smell after covid                      |
|                                             | smell recovery,                                                     |
| how to treat loss of smell,                 |                                                                     |
| Levofloxacin                                | and levofloxacin is most often found in such combinations:          |
|                                             | what is the difference between ciprofloxacin and levofloxacin       |
|                                             | what is the difference between levofloxacin and tavanic             |
|                                             | which is better, levofloxacin or ciprofloxacin                      |
|                                             | levofloxacin or amoxiclav, which is better                          |
|                                             | tavanic or levofloxacin which is better                             |
|                                             | levofloxacin compatibility with alcohol                             |
|                                             | tavanic or levofloxacin                                             |
|                                             | 4th generation fluoroquinolones in urology                          |
|                                             | antibiotics for covid19                                             |
|                                             | how to buy antibiotics without a prescription                       |
|                                             | urological antibiotics for men                                      |
| ofloxacin for prostatitis treatment regimen |                                                                     |

**Supplementary Table 2. Statistics of smell-related queries in Russia**

| Region of the Russian Federation | Population. people | Total (new cases) | Maximum per week (new cases) | Total (queries) | Maximum per week (queries) | Queries/people |
|----------------------------------|--------------------|-------------------|------------------------------|-----------------|----------------------------|----------------|
| Altai Territory                  | 2 296 773          | 15954             | 1252                         | 98146           | 11064                      | 0.04           |
| Amur Region                      | 781 850            | 20511             | 1165                         | 29495           | 2562                       | 0.04           |
| Arkhangelsk Region               | 1 128 099          | 34158             | 1593                         | 53708           | 3032                       | 0.05           |
| Astrakhan Region                 | 997 685            | 27008             | 1297                         | 38105           | 1954                       | 0.04           |
| Belgorod Region                  | 1 543 087          | 30201             | 1304                         | 81706           | 7359                       | 0.05           |
| Bryansk Region                   | 1 183 228          | 31714             | 1411                         | 76022           | 5101                       | 0.06           |
| Vladimir Region                  | 1 343 194          | 25969             | 1307                         | 96504           | 5417                       | 0.07           |
| Volgograd Region                 | 2 476 100          | 47180             | 1927                         | 123163          | 9252                       | 0.05           |
| Vologda Region                   | 1 151 751          | 47180             | 1927                         | 62594           | 4790                       | 0.05           |
| Voronezh Region                  | 2 307 100          | 64411             | 2736                         | 143372          | 11045                      | 0.06           |
| Jewish Autonomous Region         | 156 492            | 4281              | 322                          | 4419            | 387                        | 0.03           |
| Trans-Baikal Territory           | 1 054 071          | 37341             | 1876                         | 39475           | 3345                       | 0.04           |
| Ivanovo Region                   | 987 694            | 29393             | 1317                         | 53471           | 3798                       | 0.05           |
| Irkutsk Region                   | 2 375 640          | 53018             | 1933                         | 116682          | 13497                      | 0.05           |
| Kabardino-Balkarian Republic     | 870 197            | 20178             | 713                          | 21299           | 885                        | 0.02           |
| Kaliningrad Region               | 1 019 601          | 26900             | 1523                         | 38943           | 2918                       | 0.04           |
| Kaluga Region                    | 1 000 604          | 28473             | 1199                         | 68360           | 4446                       | 0.07           |
| Kamchatka Territory              | 311 985            | 13106             | 571                          | 12779           | 710                        | 0.04           |
| Karachay-Cherkess Republic       | 465 592            | 18568             | 675                          | 7982            | 392                        | 0.02           |
| Kemerovo Region                  | 2 634 376          | 30891             | 1377                         | 122241          | 12347                      | 0.05           |
| Kirov Region                     | 1 251 182          | 35041             | 1753                         | 71534           | 4285                       | 0.06           |
| Kostroma Region                  | 628 972            | 1202              | 100                          | 35937           | 3011                       | 0.06           |
| Krasnodar Territory              | 5 689 538          | 36679             | 1378                         | 287423          | 16303                      | 0.05           |
| Krasnoyarsk Territory            | 2 857 567          | 60689             | 2354                         | 151088          | 13673                      | 0.05           |
| Republic of Crimea               | 1 903 707          | 34772             | 2466                         | 94285           | 6413                       | 0.05           |
| Kurgan Region                    | 819 299            | 16787             | 758                          | 33160           | 3109                       | 0.04           |

|                             |            |        |       |         |       |      |
|-----------------------------|------------|--------|-------|---------|-------|------|
| Kursk Region                | 1 098 361  | 16787  | 758   | 68311   | 4685  | 0.06 |
| Leningrad Region            | 1 894 038  | 34158  | 1593  | 96979   | 5217  | 0.05 |
| Lipetsk Region              | 1 128 181  | 23352  | 1168  | 72541   | 5308  | 0.06 |
| Magadan Region              | 138 991    | 13106  | 571   | 4488    | 338   | 0.03 |
| Moscow                      | 12 636 312 | 960652 | 50304 | 1326923 | 58136 | 0.11 |
| Moscow Region               | 7 713 326  | 206936 | 10919 | 638954  | 30305 | 0.08 |
| Murmansk Region             | 733 158    | 45650  | 2006  | 40040   | 2212  | 0.05 |
| Nenets Autonomous District  | 44 404     | 989    | 63    | 1953    | 213   | 0.04 |
| Nizhny Novgorod Region      | 3 177 816  | 92136  | 3509  | 295507  | 15834 | 0.09 |
| Novgorod Region             | 593 232    | 26185  | 1472  | 32214   | 2378  | 0.05 |
| Novosibirsk Region          | 2 786 412  | 34437  | 1262  | 214460  | 20406 | 0.08 |
| Omsk Region                 | 1 904 294  | 39799  | 1776  | 101265  | 7793  | 0.05 |
| Orenburg Region             | 1 945 307  | 36509  | 1328  | 100097  | 8077  | 0.05 |
| Oryol Region                | 725 725    | 29213  | 1260  | 52590   | 3213  | 0.07 |
| Penza Region                | 1 292 211  | 36276  | 1598  | 86159   | 5127  | 0.07 |
| Perm Territory              | 2 580 639  | 44389  | 2323  | 135767  | 9914  | 0.05 |
| Primorsky Territory         | 1 879 486  | 39248  | 1682  | 74032   | 5671  | 0.04 |
| Pskov Region                | 621 028    | 30923  | 2889  | 31816   | 2789  | 0.05 |
| Republic of Adygea          | 463 091    | 13615  | 702   | 12929   | 958   | 0.03 |
| Republic of Altai           | 221 050    | 41949  | 1649  | 7086    | 690   | 0.03 |
| Republic of Bashkortostan   | 4 016 481  | 26994  | 1177  | 202409  | 12978 | 0.05 |
| Republic of Buryatia        | 986 132    | 32498  | 1902  | 31214   | 3475  | 0.03 |
| Republic of Dagestan        | 3 132 368  | 18568  | 675   | 42914   | 4646  | 0.01 |
| Republic of Ingushetia      | 515 970    | 14517  | 620   | 6036    | 618   | 0.01 |
| Republic of Kalmykia        | 270 139    | 18509  | 747   | 8201    | 496   | 0.03 |
| Republic of Karelia         | 609 439    | 39217  | 3176  | 30348   | 2628  | 0.05 |
| Komi Republic               | 813 859    | 38541  | 2123  | 40381   | 2982  | 0.05 |
| Mari El Republic            | 676 184    | 11385  | 373   | 27274   | 1432  | 0.04 |
| Republic of Mordovia        | 779 753    | 17207  | 627   | 52523   | 3078  | 0.07 |
| Republic of Sakha (Yakutia) | 984 703    | 32017  | 1559  | 23475   | 1550  | 0.02 |

|                                  |           |        |       |        |       |      |
|----------------------------------|-----------|--------|-------|--------|-------|------|
| Republic of North Ossetia-Alania | 693 449   | 15322  | 642   | 22308  | 1284  | 0.03 |
| Republic of Tatarstan            | 3 894 507 | 17367  | 716   | 215640 | 12905 | 0.06 |
| Republic of Tyva                 | 330 327   | 15596  | 950   | 6448   | 360   | 0.02 |
| Republic of Khakassia            | 532 266   | 21060  | 1267  | 23472  | 2345  | 0.04 |
| Rostov Region                    | 4 185 233 | 69683  | 2750  | 209825 | 15327 | 0.05 |
| Ryazan Region                    | 1 098 998 | 29213  | 1260  | 80771  | 4832  | 0.07 |
| Samara Region                    | 3 155 390 | 45398  | 2145  | 220062 | 15226 | 0.07 |
| St. Petersburg                   | 5 388 759 | 356376 | 26333 | 553274 | 28169 | 0.10 |
| Saratov Region                   | 2 396 961 | 47197  | 1892  | 134832 | 10076 | 0.06 |
| Sakhalin Region                  | 485 627   | 20959  | 1028  | 16605  | 994   | 0.03 |
| Sverdlovsk Region                | 4 291 886 | 75487  | 2834  | 347030 | 23788 | 0.08 |
| Sevastopol                       | 513 149   | 11215  | 698   | 20795  | 1899  | 0.04 |
| Smolensk Region                  | 921 620   | 25150  | 1300  | 52606  | 3183  | 0.06 |
| Stavropol Territory              | 2 794 625 | 46038  | 1713  | 110376 | 5412  | 0.04 |
| Tambov Region                    | 995 761   | 24904  | 1123  | 57875  | 3683  | 0.06 |
| Tver Region                      | 1 246 759 | 32079  | 1652  | 75080  | 4644  | 0.06 |
| Tomsk Region                     | 1 070 544 | 29619  | 1472  | 41029  | 3957  | 0.04 |
| Tula Region                      | 1 450 675 | 31603  | 1452  | 100600 | 5808  | 0.07 |
| Tyumen Region                    | 3 778 024 | 75487  | 2834  | 77417  | 6059  | 0.02 |
| Republic of Udmurtia             | 1 493 700 | 27195  | 1530  | 68232  | 5123  | 0.05 |
| Ulyanovsk Region                 | 1 219 240 | 46401  | 2014  | 72381  | 4153  | 0.06 |
| Khabarovsk Territory             | 1 302 918 | 47876  | 2394  | 53758  | 3904  | 0.04 |
| Khanty-Mansi Autonomous Area     | 1 688 378 | 50091  | 2116  | 92091  | 6514  | 0.05 |
| Chelyabinsk Region               | 3 444 025 | 48371  | 2176  | 200202 | 16099 | 0.06 |
| Chechen Republic                 | 1 500 490 | 11167  | 995   | 9972   | 379   | 0.01 |
| Chuvash Republic                 | 1 208 806 | 20787  | 902   | 62011  | 3077  | 0.05 |
| Chukotka Autonomous District     | 49 300    | 672    | 52    | 1174   | 80    | 0.02 |
| Yamal-Nenets Autonomous District | 547 111   | 36620  | 1399  | 29068  | 2126  | 0.05 |
| Yaroslavl Region                 | 1 242 356 | 31111  | 1334  | 88558  | 6221  | 0.07 |

**Supplementary Table 3. The correlation between the number of queries and new cases of COVID-19 in Russia**

| Region of Russian Federation | Correlations | p-value | Region                     | Correlations | p-value | Region                | Correlations | p-value |
|------------------------------|--------------|---------|----------------------------|--------------|---------|-----------------------|--------------|---------|
| Altai Territory              | 0.8          | 0.0000  | Magadan Region             | 0.5          | 0.0000  | Republic of Tyva      | 0.8          | 0.0000  |
| Amur Region                  | 0.8          | 0.0103  | Moscow                     | 1.0          | 0.0000  | Republic of Khakassia | 0.7          | 0.4478  |
| Arkhangelsk Region           | 0.7          | 0.0000  | Moscow Region              | 0.7          | 0.0000  | Rostov Region         | 0.6          | 0.0000  |
| Astrakhan Region             | 0.3          | 0.0019  | Murmansk Region            | 0.8          | 0.0256  | Ryazan Region         | 0.7          | 0.0000  |
| Belgorod Region              | 0.3          | 0.0000  | Nenets Autonomous District | 0.6          | 0.0011  | Samara Region         | 0.3          | 0.0000  |
| Bryansk Region               | 0.7          | 0.0000  | Nizhny Novgorod Region     | 0.7          | 0.0000  | St. Petersburg        | 0.7          | 0.0000  |
| Vladimir Region              | 0.6          | 0.0000  | Novgorod Region            | 0.8          | 0.0242  | Saratov Region        | 0.5          | 0.0000  |
| Volgograd Region             | 0.5          | 0.0000  | Novosibirsk Region         | 0.6          | 0.0000  | Sakhalin Region       | 0.8          | 0.0064  |
| Vologda Region               | 0.7          | 0.0530  | Omsk Region                | 0.5          | 0.0000  | Sverdlovsk Region     | 0.6          | 0.0000  |
| Voronezh Region              | 0.5          | 0.0000  | Orenburg Region            | 0.5          | 0.0000  | Sevastopol            | 0.7          | 0.0005  |
| Jewish Autonomous Region     | 0.9          | 0.6978  | Oryol Region               | 0.7          | 0.0001  | Smolensk Region       | 0.6          | 0.0000  |
| Trans-Baikal Territory       | 0.8          | 0.5744  | Penza Region               | 0.6          | 0.0000  | Stavropol Territory   | 0.8          | 0.0000  |
| Ivanovo Region               | 0.5          | 0.0002  | Perm Territory             | 0.3          | 0.0000  | Tambov Region         | 0.5          | 0.0000  |
| Irkutsk Region               | 0.4          | 0.0035  | Primorsky Territory        | 0.7          | 0.0003  | Tver Region           | 0.8          | 0.0000  |
| Kabardino-Balkarian Republic | 0.7          | 0.3613  | Pskov Region               | 0.8          | 0.7701  | Tomsk Region          | 0.8          | 0.0211  |
| Kaliningrad Region           | 0.7          | 0.0092  | Republic of Adygea         | 0.9          | 0.4181  | Tula Region           | 0.7          | 0.0000  |
| Kaluga Region                | 0.7          | 0.0000  | Republic of Altai          | 0.6          | 0.0000  | Tyumen Region         | 0.3          | 0.8636  |
| Kamchatka Territory          | 0.8          | 0.6483  | Republic of Bashkortostan  | 0.2          | 0.0000  | Republic of Udmurtia  | 0.3          | 0.0000  |
| Karachay-Cherkess Republic   | 0.6          | 0.0000  | Republic of Buryatia       | 0.7          | 0.7604  | Ulyanovsk Region      | 0.6          | 0.0004  |

|                       |     |        |                                  |      |        |                                  |     |        |
|-----------------------|-----|--------|----------------------------------|------|--------|----------------------------------|-----|--------|
| Kemerovo Region       | 0.7 | 0.0000 | Republic of Dagestan             | -0.2 | 0.0010 | Khabarovsk Territory             | 0.6 | 0.3335 |
| Kirov Region          | 0.6 | 0.0000 | Republic of Ingushetia           | 0.3  | 0.0000 | Khanty-Mansi Autonomous Area     | 0.6 | 0.0000 |
| Kostroma Region       | 0.8 | 0.0000 | Republic of Kalmykia             | 0.8  | 0.0000 | Chelyabinsk Region               | 0.1 | 0.0000 |
| Krasnodar Territory   | 0.7 | 0.0000 | Republic of Karelia              | 0.9  | 0.0160 | Chechen Republic                 | 0.2 | 0.5552 |
| Krasnoyarsk Territory | 0.6 | 0.0001 | Komi Republic                    | 0.8  | 0.6031 | Chuvash Republic                 | 0.5 | 0.0000 |
| Republic of Crimea    | 0.8 | 0.0000 | Mari El Republic                 | 0.6  | 0.0000 | Chukotka Autonomous District     | 0.4 | 0.0005 |
| Kurgan Region         | 0.5 | 0.0015 | Republic of Mordovia             | 0.7  | 0.0000 | Yamal-Nenets Autonomous District | 0.7 | 0.0071 |
| Kursk Region          | 0.6 | 0.0000 | Republic of Sakha (Yakutia)      | 0.7  | 0.0010 | Yaroslavl Region                 | 0.7 | 0.0000 |
| Leningrad Region      | 0.7 | 0.0000 | Republic of North Ossetia-Alania | 0.7  | 0.0002 |                                  |     |        |
| Lipetsk Region        | 0.3 | 0.0000 | Republic of Tatarstan            | 0.1  | 0.0000 |                                  |     |        |

**Supplementary Table 4. Weekly change in the increased number of online smell-related queries and the increased number of new cases of COVID-19**

| Region of Russian Federation | The beginning of the increase in the number of queries (week) | The beginning of the increase in the number of new cases of infection (week) | Change (weekly) | The beginning of the increase in the number of queries (week) | The beginning of the increase in the number of new cases of infection (week) | Change (weekly) |
|------------------------------|---------------------------------------------------------------|------------------------------------------------------------------------------|-----------------|---------------------------------------------------------------|------------------------------------------------------------------------------|-----------------|
| Altai Territory              | -----                                                         | ----                                                                         | -----           | 35                                                            | 36                                                                           | 1               |
| Amursk Region                | -----                                                         | 18                                                                           | -----           | 34                                                            | 35                                                                           | 1               |
| Arkhangelsk Region           | 14                                                            | 15                                                                           | 1               | 14                                                            | 15                                                                           | 1               |
| Bryansk Region               | 15                                                            | 15                                                                           | -----           | 35                                                            | 35                                                                           | -----           |
| Vladimir Region              | 13                                                            | 14                                                                           | 2               | 38                                                            | 40                                                                           | 2               |
| Volgograd Region             | 15                                                            | 17                                                                           | 2               | 36                                                            | 39                                                                           | 3               |
| Voronezh Region              | 15                                                            | 16                                                                           | 1               | 34                                                            | 37                                                                           | 3               |
| Ivanovo Region               | 15                                                            | 15                                                                           | -----           | 38                                                            | 40                                                                           | 2               |
| Kaliningrad Region           | -----                                                         | 15                                                                           | -----           | 36                                                            | 37                                                                           | 1               |
| Kaluga Region                | 16                                                            | 14                                                                           | 2               | 38                                                            | 38                                                                           | -----           |
| Karachay-Cherkess Republic   | 13                                                            | 15                                                                           | 2               | 33                                                            | 33                                                                           | -----           |
| Kemerovo Territory           | -----                                                         | 22                                                                           | -----           | 36                                                            | 38                                                                           | 2               |
| Kirov Region                 | -----                                                         | 21                                                                           | -----           | 37                                                            | 40                                                                           | 3               |
| Kostroma Region              | 14                                                            | 14                                                                           | -----           | 39                                                            | 36                                                                           | 3               |
| Krasnodar Territory          | 14                                                            | 15                                                                           | 1               | 36                                                            | 39                                                                           | 3               |
| Krasnoyarsk Territory        | 14                                                            | 15                                                                           | 1               | 38                                                            | 40                                                                           | 2               |
| Republic of Crimea           | -----                                                         | -----                                                                        | -----           | 35                                                            | 35                                                                           | -----           |
| Kurgan Region                | -----                                                         | 24                                                                           | -----           | 38                                                            | 39                                                                           | 1               |
| Kursk Region                 | 15                                                            | 20                                                                           | 5               | 38                                                            | 37                                                                           | 1               |
| Leningrad Region             | 13                                                            | 14                                                                           | 1               | 37                                                            | 36                                                                           | 1               |

|                                  |       |       |       |       |       |       |
|----------------------------------|-------|-------|-------|-------|-------|-------|
| Magadan Region                   | ----- | 16    | ----- | 36    | 37    | 1     |
| Moscow                           | 13    | 14    | 1     | 37    | 39    | 2     |
| Moscow Region                    | 13    | 8     | 5     | 36    | 40    | 4     |
| Murmansk Region                  | 13    | 15    | ----- | 36    | 38    | 2     |
| Nenets Autonomous District       | 14    | 16    | 2     | 37    | 39    | 2     |
| Nizhny Novgorod Region           | 15    | 15    | ----- | 37    | 40    | 3     |
| Novgorod Region                  | 15    | 16    | 1     | 37    | 39    | 2     |
| Novosibirsk Region               | 15    | 16    | 1     | 37    | 39    | 2     |
| Omsk Region                      | 24    | 24    | ----- | 37    | 36    | 1     |
| Orenburg Region                  | ----- | 16    | ----- | 35    | 37    | 2     |
| Oryol Region                     | 14    | 15    | 1     | 38    | 39    | 1     |
| Penza Region                     | ----- | 16    | ----- | 34    | 38    | 4     |
| Primorsky Territory              | ----- | 16    | ----- | 37    | 41    | 4     |
| Republic of Altai                | ----- | 17    | ----- | 37    | 38    | 1     |
| Republic of Kalmykia             | ----- | ----- | ----- | ----- | ----- | ----- |
| Republic of Karelia              | ----- | ----- | ----- | 37    | 39    | 2     |
| Mari El Republic                 | 14    | 15    | 1     | 38    | 37    | 1     |
| Republic of Mordovia             | 15    | 15    | ----- | 38    | 39    | 1     |
| Republic of Sakha (Yakutia)      | 14    | 16    | 2     | 34    | 36    | 2     |
| Republic of North Ossetia-Alania | 13    | 15    | 2     | 40    | 33    | 6     |
| Republic of Tyva                 | 14    | 19    | 5     | 36    | 38    | 2     |
| Rostov Region                    | ----- | 16    | ----- | 35    | 36    | 1     |
| Ryazan Region                    | 15    | 15    | ----- | 37    | 39    | 2     |
| St. Petersburg                   | 14    | 16    | 2     | 36    | 40    | 4     |
| Saratov Region                   | ----- | 16    | ----- | 35    | 36    | 1     |
| Sakhalin Region                  | ----- | ----- | ----  | 37    | 40    | 3     |
| Sverdlovsk Region                | ----- | 17    | ----- | 35    | 40    | 5     |
| Sevastopol                       | ----- | ----- | ----- | ----- | 41    | ----- |



|                                  |       |    |       |    |    |       |
|----------------------------------|-------|----|-------|----|----|-------|
| Smolensk Region                  | 15    | 16 | 1     | 37 | 39 | 2     |
| Stavropol Territory              | 13    | 15 | 2     | 38 | 38 | ----- |
| Tambov Region                    | 15    | 15 | ----- | 37 | 38 | 1     |
| Tver Region                      | 14    | 22 | 8     | 14 | 22 | 8     |
| Tomsk Region                     | ----- | 14 | ----- | 38 | 36 | 2     |
| Tula Region                      | 14    | 15 | 1     | 37 | 38 | 1     |
| Ulyanovsk Region                 | 15    | 15 | ----- | 34 | 36 | 2     |
| Khanty-Mansi Autonomous Area     | ----- | 16 | ----- | 37 | 36 | 1     |
| Chuvash Republic                 | 13    | 14 | 1     | 37 | 40 | ----- |
| Yamal-Nenets Autonomous District | ----- | 24 | ----- | 37 | 38 | 1     |
| Yaroslavl Region                 | 15    | 16 | 1     | 37 | 37 | ----- |

**Supplementary Table 5. Statistics of levofloxacin-related queries in Russia**

| Region                           | New cases of infection | The number of levofloxacin-related queries | The levofloxacin queries/new infection cases ratio |
|----------------------------------|------------------------|--------------------------------------------|----------------------------------------------------|
| Moscow                           | 963941                 | 822911                                     | 0.9                                                |
| St. Petersburg                   | 360459                 | 285314                                     | 0.8                                                |
| Tver Region                      | 32688                  | 40679                                      | 1.2                                                |
| Republic of North Ossetia-Alania | 15473                  | 26417                                      | 1.7                                                |
| Leningrad Region                 | 34846                  | 44392                                      | 1.3                                                |
| Arkhangelsk Region               | 55642                  | 18857                                      | 0.3                                                |
| Novgorod Region                  | 26582                  | 17263                                      | 0.6                                                |
| Kaliningrad Region               | 27421                  | 16781                                      | 0.6                                                |
| Mari El Republic                 | 11532                  | 13497                                      | 1.2                                                |
| Altai Territory                  | 16090                  | 78015                                      | 4.8                                                |
| Stavropol Territory              | 46642                  | 103974                                     | 2.2                                                |
| Moscow Region                    | 963941                 | 400554                                     | 0.4                                                |
| Nenets Autonomous District       | 1001                   | 558                                        | 0.6                                                |
| Smolensk Region                  | 25618                  | 31091                                      | 1.2                                                |
| Bryansk Region                   | 32158                  | 51433                                      | 1.6                                                |
| Vladimir Region                  | 26509                  | 62799                                      | 2.4                                                |
| Ryazan Region                    | 23946                  | 61161                                      | 2.6                                                |
| Nizhny Novgorod Region           | 93747                  | 162097                                     | 1.7                                                |
| Krasnodar Territory              | 37301                  | 286333                                     | 7.7                                                |
| Penza Region                     | 37018                  | 56406                                      | 1.5                                                |
| Chuvash Republic                 | 21014                  | 47122                                      | 2.2                                                |
| Ulyanovsk Region                 | 46895                  | 66214                                      | 1.4                                                |
| Kaluga Region                    | 35567                  | 36908                                      | 1.0                                                |

|                              |       |        |     |
|------------------------------|-------|--------|-----|
| Kaluga Region                | 28984 | 54205  | 1.9 |
| Volgograd Region             | 47980 | 104269 | 2.2 |
| Kostroma Region              | 18120 | 16456  | 0.9 |
| Tambov Region                | 25406 | 56262  | 2.2 |
| Oryol Region                 | 29623 | 28292  | 1.0 |
| Tula Region                  | 32121 | 61625  | 1.9 |
| Yaroslavl Region             | 31751 | 39911  | 1.3 |
| Ivanovo Region               | 29864 | 28996  | 1.0 |
| Kursk Region                 | 29731 | 78557  | 2.6 |
| Khanty-Mansi Autonomous Area | 50072 | 34701  | 0.7 |
| Saratov Region               | 48057 | 149431 | 3.1 |
| Kemerovo Region              | 31169 | 82028  | 2.6 |
| Orenburg Region              | 36931 | 79134  | 2.1 |
| Amursk Region                | 20688 | 16179  | 0.8 |
| Voronezh Region              | 65749 | 122168 | 1.9 |
| Primorsky Territory          | 39688 | 34037  | 0.9 |
| Sverdlovsk Region            | 76315 | 145440 | 1.9 |
| Tomsk Region                 | 29879 | 18982  | 0.6 |
| Republic of Mordovia         | 17448 | 32854  | 1.9 |
| Krasnoyarsk Territory        | 60660 | 286333 | 4.7 |
| Novosibirsk Region           | 34917 | 176262 | 5.0 |
| Kurgan Region                | 17112 | 23857  | 1.4 |
